# Supplementary material
Source: Springer Nature journal article supplement (https://www.springermedizin.de/resource/supplementary/12955_2005_221_MOESM3_ESM.pdf/9559932)
Supplement: MOESM3 [file 9559932]

- Literature review
- Focus groups
- Item selection
- Translations
- Pilot study
- Field study
- Implementation study
